# Supplementary material for: Pharmacokinetics and Pharmacodynamics of Intensive Antituberculosis Treatment of Tuberculous Meningitis
Source: PubMed Central journal article supplement (PMC7158205; doi:10.1002/cpt.1783), 2020-02-29
Supplement: CPT-107-1023-s002.pdf [file CPT-107-1023-s002.pdf]

## NONMEM code for final rifampin population PK model

### \$INPUT

ID ; Patient ID  
TIME ; Time of sample/dose  
DV ; Dependent variable (natural logarithm of observed concentrations,  $\mu\text{g/L}$ )  
WT ; Body weight (kg, covariate)  
SEX ; Age (months, covariate)  
DOSE ; Dose (mg, covariate)  
CSFP ; CSF protein (g/L, covariate)  
EVID ; Event ID record  
MDV ; Missing dependent variable (1=missing)  
AMT ; Dose amount (mg)  
CMT ; Compartment

### \$DATA

dataset.csv IGNORE=#

### \$SUBROUTINE

ADVAN6 TOL=9

### \$MODEL

COMP = (1) ; Dose compartment  
COMP = (2) ; Central compartment  
COMP = (3) ; CSF compartment  
COMP = (4) ; Enzyme compartment  
COMP = (5) ; Transit compartment 1  
COMP = (6) ; Transit compartment 2  
COMP = (7) ; Transit compartment 3  
COMP = (8) ; Transit compartment 4  
COMP = (9) ; Transit compartment 5

\$PK

```
;------ Dose covariate -----  
FEMAX = THETA(11) ; Maximum dose effect on relative bioavailability  
FD50 = THETA(12) ; Dose to reach 50% of maximum effect  
CDOSE = 1 + FEMAX * (DOSE-450)/(FD50+(DOSE-450)) ; Dose covariate relationship  
;------  
;------ CSF protein covariate -----  
CCSFP = 1 + (CSFP - 1.6) * THETA(13) ; Linear covariate relationship for CSF protein  
;------  
;------ Lean bodyweight -----  
BMI = WT/(HT**2) ; Calculation of BMI  
IF (SEX.EQ.1) THEN  
LBW = (9270*WT)/(6680+216*BMI) ; Lean bodyweight for males  
ENDIF  
IF (SEX.EQ.2) THEN  
LBW = (9270*WT)/(8780+244*BMI) ; Lean bodyweight for females  
ENDIF  
;------  
TVCL = THETA(1) * ((LBW/70)**0.75) ; Population clearance  
CL = TVCL * EXP(ETA(1)) ; Individual clearance  
  
TVV2 = THETA(2) * (LBW/70) ; Population central volume  
V2 = TVV2 * EXP(ETA(2)) ; Individual central volume  
  
TVMT = THETA(3) ; Population mean transit time  
MT = TVMT * EXP(ETA(3)) ; Individual mean transit time  
  
TVF1 = THETA(4) * CDOSE ; Population relative bioavailability  
F1 = TVF1 * EXP(ETA(4)) ; Individual relative bioavailability
```

|                             |                                             |
|-----------------------------|---------------------------------------------|
| TVEMAX = THETA(5)           | ; Maximum increase in enzyme formation rate |
| EMAX = TVEMAX * EXP(ETA(5)) | ; Individual Emax                           |
| TVEC50 = THETA(6)           | ; Plasma concentration to reach 50% of Emax |
| EC50 = TVEC50 * EXP(ETA(6)) | ; Individual EC50                           |
| TVKENZ = THETA(7)           | ; Population enzyme degradation rate        |
| KENZ = TVKENZ * EXP(ETA(7)) | ; Individual enzyme degradation rate        |
| TVQ = THETA(8)              | ; Population inter-compartment clearance    |
| Q = TVQ * EXP(ETA(8))       | ; Individual inter-compartment clearance    |
| TVPC = THETA(9)*CCSFP       | ; Population partition coefficient          |
| PC = TVPC * EXP(ETA(9))     | ; Individual partition coefficient          |
| TVV3 = THETA(10) * (LBW/70) | ; Population CSF volume                     |
| V3 = TVV3 * EXP(ETA(10))    | ; Individual CSF volume                     |
| NN= 5                       | ; Number of transit compartments            |
| KTR = (NN + 1) / MT         | ; Transit rate constant                     |
| K15 = KTR                   | ; Transit rate constant (COMP 1 --> 5)      |
| K56 = KTR                   | ; Transit rate constant (COMP 5 --> 6)      |
| K67 = KTR                   | ; Transit rate constant (COMP 6 --> 7)      |
| K78 = KTR                   | ; Transit rate constant (COMP 7 --> 8)      |
| K89 = KTR                   | ; Transit rate constant (COMP 8 --> 9)      |
| K92 = KTR                   | ; Transit rate constant (COMP 9 --> 2)      |
| K20 = CL/V2                 | ; Elimination rate constant (COMP 2 --> 0)  |
| K23 = Q * PC/V2             | ; Distribution rate constant (COMP 2 --> 3) |
| K32 = Q/V3                  | ; Distribution rate constant (COMP 3 --> 2) |
| S2 = V2/1000                | ; Scaling for central volume                |
| S3 = V3/1000                | ; Scaling for CSF volume                    |

## \$DES

|                                                                   |                                  |
|-------------------------------------------------------------------|----------------------------------|
| $CP = A(2)/V2$                                                    | ; Predicted plasma concentration |
| $EFF = (EMAX * CP) / (EC50 + CP)$                                 | ; Effect of plasma concentration |
| $DADT (1) = -A(1) * K15$                                          | ; 1 Dose compartment             |
| $DADT (2) = A(9) * K92 - A(2) * A(4) * K20 - A(2)*K23 + A(3)*K32$ | ; 2 Central compartment          |
| $DADT (3) = A(2)*K23 - A(3)*K32$                                  | ; 3 CSF compartment              |
| $DADT (4) = KENZ * (1 + EFF) - KENZ * A(4)$                       | ; 4 Enzyme compartment           |
| $DADT (5) = A(1) * K15 - A(5) * K56$                              | ; 5 Transit compartment 1        |
| $DADT (6) = A(5) * K56 - A(6) * K67$                              | ; 6 Transit compartment 2        |
| $DADT (7) = A(6) * K67 - A(7) * K78$                              | ; 7 Transit compartment 3        |
| $DADT (8) = A(7) * K78 - A(8) * K89$                              | ; 8 Transit compartment 4        |
| $DADT (9) = A(8) * K89 - A(9) * K92$                              | ; 9 Transit compartment 5        |

## \$ERROR

|                                      |                                                |
|--------------------------------------|------------------------------------------------|
| $IF(F.GT.0) IPRED = LOG(F)$          | ; Natural logarithm of predictions             |
| $IF (CMT.EQ.2) W = SQRT(SIGMA(1,1))$ | ; Plasma concentration residual error          |
| $IF (CMT.EQ.3) W = SQRT(SIGMA(2,2))$ | ; CSF concentration residual error             |
| $IRES = IPRED - DV$                  | ; Individual residual error                    |
| $IWRES = IRES / W$                   | ; Individual weighted residual error           |
| $IF (CMT.EQ.2) Y = IPRED + EPS(1)$   | ; Plasma concentration additive residual error |
| $IF (CMT.EQ.3) Y = IPRED + EPS(2)$   | ; CSF concentration additive residual error    |

## \$THETA

|               |                                                |
|---------------|------------------------------------------------|
|               | ; Initial estimates of theta                   |
| (0, 10.1)     | ; 1. Clearance                                 |
| (0, 76)       | ; 2. Central volume of distribution            |
| (0, 0.99)     | ; 3. Mean transit time                         |
| (1) FIX       | ; 4. Relative bioavailability                  |
| (1.16) FIX    | ; 5. Maximum increase in enzyme formation rate |
| (0.0699) FIX  | ; 6. Plasma concentration to reach 50% of Emax |
| (0.00603) FIX | ; 7. Enzyme degradation rate                   |
| (0, 0.00387)  | ; 8. Inter-compartment clearance               |
| (0, 0.0712)   | ; 9. Partition coefficient                     |
| (0.15) FIX    | ; 10. CSF volume of distribution               |

|                                                  |                                                  |
|--------------------------------------------------|--------------------------------------------------|
| (0.504) FIX                                      | ; 11. Maximum effect on relative bioavailability |
| (67) FIX                                         | ; 12. Dose to reach 50% of maximum effect        |
| (0, 0.141)                                       | ; 13. CSF protein effect on PC                   |
| <br>                                             |                                                  |
| \$OMEGA                                          | ; Initial estimates for omega                    |
| 0.115                                            | ; 1. Clearance                                   |
| 0.0462                                           | ; 2. Central volume of distribution              |
| 0.474                                            | ; 3. Mean transit time                           |
| 0.11                                             | ; 4. Relative bioavailability                    |
| 0 FIX                                            | ; 5. Maximum increase in enzyme formation rate   |
| 0 FIX                                            | ; 6. Plasma concentration to reach 50% of Emax   |
| 0 FIX                                            | ; 7. Enzyme degradation rate                     |
| 0.924                                            | ; 8. Inter-compartment clearance                 |
| 0 FIX                                            | ; 9. Partition coefficient                       |
| 0 FIX                                            | ; 10 CSF volume of distribution                  |
| <br>                                             |                                                  |
| \$SIGMA                                          | ; Initial estimates of sigma                     |
| (0.253)                                          | ; 1. Plasma concentration residual variability   |
| (0.49)                                           | ; 2. CSF concentration residual variability      |
| <br>                                             |                                                  |
| \$ESTIMATION POSTHOC MAXEVAL=9999 METHOD=1 INTER |                                                  |

## NONMEM code for final isoniazid population PK model

### \$INPUT

ID ; Patient ID  
TIME ; Time of sample/dose  
DV ; Dependent variable (natural logarithm of observed concentrations,  $\mu\text{g/L}$ )  
WT ; Body weight (kg, covariate)  
SEX ; Age (months, covariate)  
EVID ; Event ID record  
MDV ; Missing dependent variable (1=missing)  
AMT ; Dose amount (mg)  
CMT ; Compartment

### \$DATA

dataset.csv IGNORE=#

### \$ABBREVIATED COMRES=4

### \$SUBROUTINE

ADVAN6 TOL=9

### \$MODEL

COMP = (1) ; Dose compartment  
COMP = (2) ; Central compartment  
COMP = (3) ; CSF compartment  
COMP = (4) ; Transit compartment 1  
COMP = (5) ; Transit compartment 2  
COMP = (6) ; Transit compartment 3  
COMP = (7) ; Transit compartment 4  
COMP = (8) ; Transit compartment 5  
COMP = (9) ; Plasma AUC compartment  
COMP = (10) ; CSF AUC compartment

\$MIX

NSPOP = 2 ; Number of sub-population  
PMIX = THETA(9) ; Probability  
P(2) = PMIX ; Probability of subpopulation 2  
P(1) = 1-PMIX ; Probability of subpopulation 1

\$PK

;------ Lean bodyweight-----

BMI = WT/(HT\*\*2) ; Calculation of BMI  
IF (SEX.EQ.1) THEN  
LBW = (9270\*WT)/(6680+216\*BMI) ; Lean bodyweight for males  
ENDIF  
IF (SEX.EQ.2) THEN  
LBW = (9270\*WT)/(8780+244\*BMI) ; Lean bodyweight for females  
ENDIF

;------

IF (MIXNUM.EQ.1) THEN  
TVCL = THETA (1) \* (LBW/70) \*\* 0.75 ; Clearance for subpopulation 1  
ENDIF  
IF (MIXNUM.EQ.2) THEN  
TVCL = THETA (2) \* (LBW/70) \*\* 0.75 ; Clearance for subpopulation 2  
ENDIF  
CL = TVCL \* EXP(ETA(1)) ; Individual clearance  
  
TVV2 = THETA(3) \* (LBW/70) ; Population central volume  
V2 = TVV2 \* EXP(ETA(2)) ; Individual central volume  
  
TVMT = THETA(4) ; Population mean transit time  
MT = TVMT \* EXP(ETA(3)) ; Individual mean transit time  
  
TVF1 = THETA(5) ; Population relative bioavailability  
F1 = TVF1 \* EXP(ETA(4)) ; Individual relative bioavailability

```

TVQ = THETA(6) ; Population inter-compartment clearance
Q = TVQ * EXP(ETA(5)) ; Individual inter-compartment clearance

TVPC = THETA(7) ; Population partition coefficient
PC = TVPC * EXP(ETA(6)) ; Individual partition coefficient

TVV3 = THETA(8) * (LBW/70) ; Population CSF volume
V3 = TVV3 * EXP(ETA(7)) ; Individual CSF volume

NN= 5 ; Number of transit compartments
KTR = (NN + 1) / MT ; Transit rate constant
K14 = KTR ; Transit rate constant (COMP 1 --> 4)
K45 = KTR ; Transit rate constant (COMP 4 --> 5)
K56 = KTR ; Transit rate constant (COMP 5 --> 6)
K67 = KTR ; Transit rate constant (COMP 6 --> 7)
K78 = KTR ; Transit rate constant (COMP 7 --> 8)
K82 = KTR ; Transit rate constant (COMP 8 --> 2)
K20 = CL/V2 ; Elimination rate constant (COMP 2 --> 0)
K23 = Q * PC/V2 ; Distribution rate constant (COMP 2 --> 3)
K32 = Q/V3 ; Distribution rate constant (COMP 3 --> 2)
S2 = V2/1000 ; Scaling for central volume
S3 = V3/1000 ; Scaling for CSF volume

IF(NEWIND.LE.1) THEN ; Assign negative value for the new subject
  COM(1)=-1 ; Holder of plasma Cmax
  COM(2)=-1 ; Holder of plasma Tmax
  COM(3)=-1 ; Holder of CSF Cmax
  COM(4)=-1 ; Holder of CSF Tmax
ENDIF

$DES

DADT (1) = -A(1) * K14 ; 1 Dose compartment
DADT (2) = A(8) * K82 - A(2) * K20 - A(2)*K23 + A(3)*K32 ; 2 Central compartment

```



|                                    |                                                |
|------------------------------------|------------------------------------------------|
| DADT (3) = A(2)*K23 - A(3)*K32     | ; 3 CSF compartment                            |
| DADT (4) = A(1) * K14 - A(4) * K45 | ; 4 Transit compartment 1                      |
| DADT (5) = A(4) * K45 - A(5) * K56 | ; 5 Transit compartment 2                      |
| DADT (6) = A(5) * K56 - A(6) * K67 | ; 6 Transit compartment 3                      |
| DADT (7) = A(6) * K67 - A(7) * K78 | ; 7 Transit compartment 4                      |
| DADT (8) = A(7) * K78 - A(8) * K82 | ; 8 Transit compartment 8                      |
|                                    |                                                |
| DADT (9) = A(2)                    | ; 9 Accumulated plasma amount                  |
| AUC_P = A(9)/S2                    | ; Plasma AUC                                   |
| DADT (10) = A(3)                   | ; 10 Accumulated CSF amount                    |
| AUC_C = A(10)/S3                   | ; CSF AUC                                      |
|                                    |                                                |
| CT=A(2)/S2                         | ; Plasma concentration                         |
| IF(CT.GT.COM(1)) THEN              |                                                |
| COM(1)=CT                          | ; Plasma Cmax                                  |
| COM(2)=T                           | ; Plasma Tmax                                  |
| ENDIF                              |                                                |
|                                    |                                                |
| CCSF=A(3)/S3                       | ; CSF concentration                            |
| IF(CCSF.GT.COM(3)) THEN            |                                                |
| COM(3)=CCSF                        | ; CSF Cmax                                     |
| COM(4)=T                           | ; CSF Tmax                                     |
| ENDIF                              |                                                |
|                                    |                                                |
| \$ERROR                            |                                                |
| IF(F.GT.0) IPRED = LOG(F)          | ; Natural logarithm of predictions             |
| IF (CMT.EQ.2) W = SQRT(SIGMA(1,1)) | ; Plasma concentration residual error          |
| IF (CMT.EQ.3) W = SQRT(SIGMA(2,2)) | ; CSF concentration residual error             |
| IRES = IPRED - DV                  | ; Individual residual error                    |
| IWRES = IRES / W                   | ; Individual weighted residual error           |
| IF (CMT.EQ.2) Y = IPRED + EPS(1)   | ; Plasma concentration additive residual error |
| IF (CMT.EQ.3) Y = IPRED + EPS(2)   | ; CSF concentration additive residual error    |

|                                                  |                                                |
|--------------------------------------------------|------------------------------------------------|
| CMAX_P = COM(1)                                  | ; Output plasma Cmax                           |
| TMAX_P = COM(2)                                  | ; Output plasma Tmax                           |
| CMAX_C = COM(3)                                  | ; Output CSF Cmax                              |
| TMAX_C = COM(4)                                  | ; Output CSF Tmax                              |
|                                                  |                                                |
| \$THETA                                          | ; Initial estimates of theta                   |
| (0, 40.7)                                        | ; 1. Clearance for subpopulation 1             |
| (0, 18.1)                                        | ; 2. Clearance for subpopulation 2             |
| (0, 96.7)                                        | ; 3. Central volume of distribution            |
| (0, 0.357)                                       | ; 4. Mean transit time                         |
| (1) FIX                                          | ; 5. Relative bioavailability                  |
| (0, 0.0344)                                      | ; 6. Inter-compartment clearance               |
| (1) FIX                                          | ; 7. Partition coefficient                     |
| (0.15) FIX                                       | ; 8. CSF volume of distribution                |
| (0, 0.399)                                       | ; 9. Probability of subpopulation 2            |
|                                                  |                                                |
| \$OMEGA                                          | ; Initial estimates for omega                  |
| 0.0215                                           | ; 1. Clearance                                 |
| 0 FIX                                            | ; 2. Central volume of distribution            |
| 1.05                                             | ; 3. Mean transit time                         |
| 0.212                                            | ; 4. Relative bioavailability                  |
| 0.516                                            | ; 5. Inter-compartment clearance               |
| 0 FIX                                            | ; 6. Partition coefficient                     |
| 0 FIX                                            | ; 7. CSF volume of distribution                |
|                                                  |                                                |
| \$SIGMA                                          | ; Initial estimates of sigma                   |
| (0.299)                                          | ; 1. Plasma concentration residual variability |
| (0.274)                                          | ; 2. CSF concentration residual variability    |
|                                                  |                                                |
| \$ESTIMATION POSTHOC MAXEVAL=9999 METHOD=1 INTER |                                                |

## NONMEM code for final isoniazid population PD model

\$INPUT

ID ; Patient ID  
TIME ; Time of sample/dose  
DV ; Dependent variable (1 = Death, 0 = survival)  
CMT ; Compartment  
EVID ; Event ID record  
HIV ; Covariate (1 = HIV co-infection, 0 = no HIV co-infection)  
GCS ; Covariate (Glasgow coma score)  
CMAXC ; Isoniazid CSF maximum concentration ( $\mu\text{g/L}$ )

\$DATA

dataset.csv IGNORE=#

\$SUBROUTINE

ADVAN6 TOL=3

\$MODEL

COMP = (1) ; Hazard

\$PK

;------ Isoniazid CSF Cmax effect-----;

EMAX = THETA(5) ; Maximum effect on hazard  
EC50 = THETA(6) ; CSF Cmax to reach 50% of maximum effect  
HILL = THETA(7) ; Shape parameter  
EFF = 1 - EMAX\*CMAXC\*\*HILL/(CMAXC\*\*HILL+EC50\*\*HILL)  
; CSF Cmax effect

;------;

;------ GCS covariate-----;

CGCS = 1 + THETA(3)\*(GCS-14) ; Linear covariate relationship for GCS

;------;

----- HIV covariate-----

CHIV = 1 + THETA(4)\*HIV ; Linear covariate relationship for HIV

-----

TVSIGCE = THETA(1) ; Standard deviation of log-normal distribution

SIGCE = TVSIGCE + ETA(1) ; Individual standard deviation

TVMUCE = THETA(2) \* CGCS \* CHIV ; Median of log-normal distribution

MUCE = TVMUCE + ETA(2) ; Individual median

PI = 3.1415 ; Pi value

\$DES

DEL = 1E-16 ; Small number to avoid LOG(0)

TIMX = T+DEL ; Time

LTIMX = LOG(TIMX) ; Natural Log transformation of time

X2X = (LTIMX-MUCE)/SIGCE ; Part 1 of log-normal distribution

PDF2X = EXP(-(1/2)\*(X2X\*\*2))/SQRT(2\*PI) ; Part 2 of log-normal distribution

LOGCEX = ((1/(TIMX\*SIGCE))\*PDF2X/(1-PHI(X2X))) \*EFF ; Log-normal distribution

DADT(1)= LOGCEX ; Log-normal distribution hazard

\$ERROR

DE = 1E-16 ; Small number to avoid LOG(0)

TIM = TIME+DE ; Time

LTIM = LOG(TIM) ; Natural Log transformation of time

CHZ = A(1) ; Cumulative hazard

SUR = EXP(-CHZ) ; Survival function

X2 = (LTIM-MUCE)/SIGCE ; Part 1 of log-normal distribution

PDF2 = EXP(-(1/2)\*(X2\*\*2))/SQRT(2\*PI) ; Part 2 of log-normal distribution

LOGCE = ((1/(TIM\*SIGCE))\*PDF2/(1-PHI(X2))) \*EFF ; Log-normal distribution

HAZ = LOGCE ; Log-normal distribution hazard

```

IF(DV.EQ.0) THEN
  PR = SUR ; Censored event (probability of survival)
ENDIF
IF (DV.EQ.1) THEN
  PR = SUR * HAZ ; Observed event
ENDIF
Y = PR

$THETA ; Initial estimates of theta
(0, 1.18) ; 1. Standard deviation
(0, 3.42) ; 2. Median
(0, 0.0907) ; 3. GCS effect on median
(-0.5, -0.276) ; 4. HIV effect on median
(0.99) FIX ; 5. Maximum effect of CSF Cmax
(0, 1.37) ; 6. CSF Cmax to reach 50% of maximum effect
(0, 2.8) ; 7. Shape parameter

$OMEGA ; Initial estimates for omega
0 FIX ; 1. Standard deviation
0 FIX ; 2. Median

$ ESTIMATION MAXEVAL=9999 POSTHOC METHOD=1 MCETA=500 LAPLACIAN LIKE NUMERICAL

```
